# Supplementary material for: Design and preparation of a non-enzymatic hydrogen peroxide sensor based on a novel rigid chain liquid crystalline polymer/reduced graphene oxide composite
Source: Royal Society of Chemistry journal article supplement (doi:10.1039/c5ra10540d), 2015-01-01
Supplement: c5ra10540d1.pdf [file c5ra10540d1.pdf]

Electronic Supplementary Information (ESI) for  
Design and Preparation of Non-enzymatic Hydrogen Peroxide Sensor  
based on a Novel Rigid Chain Liquid Crystalline Polymer/Graphene  
Oxide Composite

Ya-qi Yang, He-lou Xie\*, Jun Tang, Shuai Tang, Jie Yi\*, Hai-liang Zhang\*  
*Key Laboratory of Special Functional Polymer Materials of Hunan Province, Key  
Laboratory of Advanced Functional Polymer Materials of Colleges and Universities  
of Hunan Province and Key Lab of Environment-friendly Chemistry and Application  
in Ministry of Education, College of Chemistry, Xiangtan University, Xiangtan  
411105, Hunan Province, China*

\* To whom the correspondence should be addressed.

E-mail: xhl20040731@163.com (HLX)

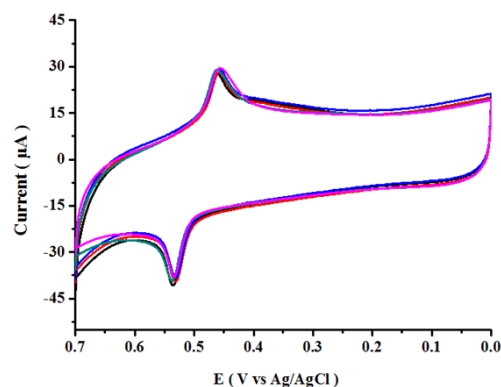

S-Fig 1. The same electrode at 10 µM H<sub>2</sub>O<sub>2</sub> for five times cyclic voltammogram.

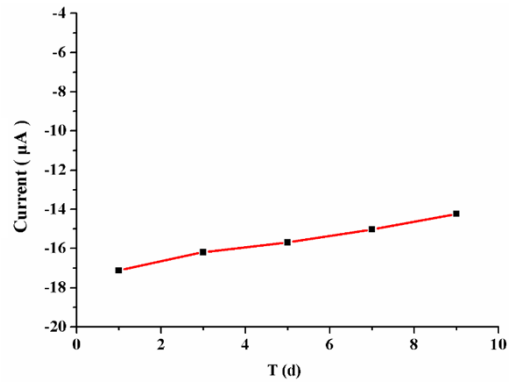

S-Fig 2. Cyclic voltammogram of PFECS/rGO/GCE response current of 10  $\mu\text{M}$   $\text{H}_2\text{O}_2$  every 3 days.

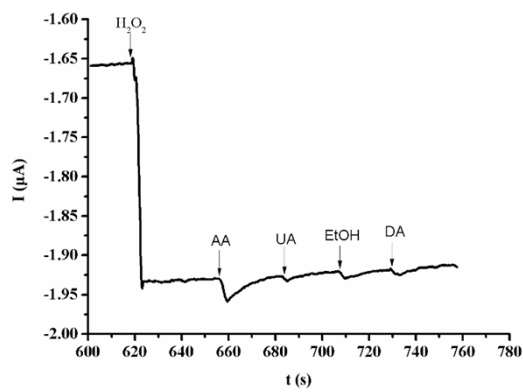

S-Fig 3. Amperometric responses of PFECS/rGO/GCE upon the successive addition of 50  $\mu\text{M}$   $\text{H}_2\text{O}_2$ , 5 mM dopamine (DA), 5 mM uric acid (UA), 5 mM ascorbic acid (AA) and 5 mM ethanol into  $\text{N}_2$ -saturated 0.2 M pH 7 PBS with an applied potential 0.4 V under a stirring condition.
